# Supplementary material for: PbII-catalyzed transformation of aromatic nitriles to heptanitrogen anionsviasodium azide: a combined experimental and theoretical study
Source: Royal Society of Chemistry journal article supplement (doi:10.1039/c8ra08486f), 2018-01-01
Supplement: c8ra08486f1.pdf [file c8ra08486f1.pdf]

## Supplementary Materials for

# **Pb<sup>II</sup>-Catalyzed Transformation of Aromatic Nitriles to Heptanitrogen Anion via Sodium Azide: A Combined Experimental and Theoretical Study**

**Rong-Yi Huang,<sup>\*,a</sup> Chao Zhang,<sup>a</sup> Da Yan,<sup>a</sup> Zhi Xiong,<sup>a</sup> Heng Xu,<sup>\*,a</sup> and Xiao-Ming Ren<sup>\*,b</sup>**

*<sup>a</sup> Anhui Key Laboratory of Functional Coordination Compounds and School of Chemistry and Chemical Engineering, Anqing Normal University, Anqing 246011, P. R. China*

*<sup>b</sup> State Key Laboratory of Materials-Oriented Chemical Engineering and College of Chemistry & Molecular Engineering, Nanjing Tech University, Nanjing, 210009, P. R. China*

# Supporting Information Contents

## 1. Thermal decomposition behaviors of **MOF-N<sub>7</sub>** and **Pb-FBA**

**Table S1:** Selected bond lengths (Å) and angles (°) for **MOF-N<sub>7</sub>**.

**Table S2:** Selected bond lengths (Å) and angles (°) for **α-Pb(N<sub>3</sub>)<sub>2</sub>**.

**Table S3:** Selected bond lengths (Å) and angles (°) for **Pb-FBA**.

**Table S4:** The calculated interaction energies corrected with BSSE and ZPE,  $\Delta E_{\text{int}}$  for the associations **Pb⋯N<sub>3</sub>** and **Pb⋯4-FBN** (kcal·mol<sup>-1</sup>).

**Table S5:** Topological parameters at bond critical points of the Pb-N and N-N bonds in **MOF-N<sub>7</sub>'**.

**Fig. S1.** The calculated structures for the **Pb⋯N<sub>3</sub>** and **Pb⋯4-FBN** associations.

**Fig. S2.** The structures of the representative fragments **N<sub>7</sub><sup>3-</sup>-C<sub>2h</sub>**, **N<sub>7</sub><sup>3-</sup>-C<sub>2v</sub>**, and **MOF-N<sub>7</sub>'**.

**Fig. S3.** The XPRD patterns obtained for **MOF-N<sub>7</sub>**.

**Fig. S4.** (a) The coordination environment of the Pb<sup>2+</sup> ions in **MOF-N<sub>7</sub>** with the ellipsoids drawn at the 30% probability level. Distorted water molecules and all hydrogen atoms were omitted for clarity. (b) The 1D chain constructed via the C<sub>2</sub>O<sub>4</sub><sup>2-</sup> anions and [Pb<sub>6</sub>O<sub>2</sub>]<sup>8+</sup> cationic clusters along the *a*-axis. (c) The 1D chain constructed via the CHDA<sup>2-</sup> anions and Pb<sup>2+</sup> ions along the *a*-axis. (d) The 2D metal-organic layer parallel to the *ab* plane in **MOF-N<sub>7</sub>**. (e) The 3D open framework constructed from the 2D layers and N<sub>7</sub> anionic pillars of **MOF-N<sub>7</sub>**.

**Fig. S5.** The FT-IR spectrum obtained of **MOF-N<sub>7</sub>**.

**Fig. S6.** The coordination environment of the Pb<sup>2+</sup> ions in **α-Pb(N<sub>3</sub>)<sub>2</sub>** with the ellipsoids drawn at the 30% probability level.

**Fig. S7.** The coordination environment of the Pb<sup>2+</sup> ion in **Pb-FBA** with the ellipsoids drawn at the 30% probability level. Distorted water molecules and all hydrogen atoms were omitted for clarity.

**Fig. S8.** The ELF- $\pi$  isosurfaces (value = 0.70) of **N<sub>7</sub><sup>3-</sup>-C<sub>2v</sub>** (top) and the **N<sub>7</sub><sup>3-</sup>** polynitrogen fragment in **MOF-N<sub>7</sub>'** (bottom).

**Fig. S9.** The TGA plot obtained for **Pb-FBA** at a heating rate of  $10^{\circ}\text{C}\cdot\text{min}^{-1}$  under a flow of  $\text{N}_2$ .

### 1. Thermal decomposition behaviour of **MOF-N<sub>7</sub>** and **Pb-FBA**

To test the robustness of **MOF-N<sub>7</sub>** and **Pb-FBA**, thermogravimetric analyses (TGA) were obtained via heating the crystalline samples in the temperature range of 20 to 800 °C under a N<sub>2</sub> atmosphere (Figures 7 and S9). For **MOF-N<sub>7</sub>**, the TGA results show that the **MOF-N<sub>7</sub>** framework was stable up to approximately 369 °C and then started to abruptly decompose. The first mass loss of the four guest water molecules and one hydronium ion per formula unit occurred in range of 20 to 369 °C with a 3.5% mass loss (calc. 3.4%). The second major mass loss of the four CHDA<sup>2-</sup> ligands, one ox<sup>2-</sup> ligand and two O<sup>2-</sup> anions, occurred in range of 369 to 430 °C with a 31.5% mass loss (calc. 30.1%). The third minor weight loss of the N<sub>7</sub><sup>3-</sup> polynitrogen occurred with a 3.8% mass loss (calc. 3.7%). The percentage remaining was 61.0%, meaning that the final product was metallic lead (calc. 62.6%). In addition, the DSC curve presents three endothermic peaks at 381, 406 and 419 °C in range of 369 to 430 °C, which can be assigned to the removal of the four CHDA<sup>2-</sup> ligands, one ox<sup>2-</sup> ligand and two O<sup>2-</sup> anions, respectively. Interestingly, a larger exothermic peak was observed at 607 °C in range of 430 to 800 °C, accompanied an exothermic enthalpy change of 8.61 kJ/g, which was due to the decomposition of the N<sub>7</sub><sup>3-</sup> polynitrogen. **Pb-FBA** lost two guest water molecules from 20 to 400 °C, accompanied by a mass loss of 4.4% (calc.4.8%). After 400 °C, **Pb-FBA** started to abruptly decompose, which corresponds to the decomposition of **FBA<sup>-</sup>** and O<sup>2-</sup> anions. Up until 800 °C, **Pb-FBA** did not decompose completely.

**Table S1:**Selected bond lengths (Å) and angles (°) for **MOF-N<sub>7</sub>**.

|                     |           |                     |           |
|---------------------|-----------|---------------------|-----------|
| Pb(1)–O(1)          | 2.314(7)  | Pb(1)–O(2)          | 2.592(10) |
| Pb(1)–O(1)#1        | 2.314(7)  | Pb(1)–O(2)#2        | 2.592(10) |
| Pb(1)–O(4)          | 3.029(12) | Pb(1)–N(1)          | 2.600(2)  |
| Pb(1)–O(4)#2        | 3.029(12) | Pb(2)–O(3)          | 2.642(12) |
| Pb(2)–O(5)#3        | 2.562(12) | Pb(2)–O(6)#3        | 2.934(12) |
| Pb(2)–O(3)#4        | 2.642(12) | Pb(2)–O(6)#5        | 2.588(12) |
| Pb(2)–O(5)#6        | 2.562(12) | Pb(2)–O(6)#6        | 2.934(12) |
| Pb(2)–O(6)#7        | 2.588(12) | Pb(3)–O(1)          | 2.278(7)  |
| Pb(3)–O(2)          | 2.731(11) | Pb(3)–O(3)          | 2.638(12) |
| Pb(3)–O(4)#4        | 2.438(11) | Pb(3)–N(1)#4        | 2.910(8)  |
| Pb(3)–O(5)#6        | 2.829(12) | Pb(3)–O(3)#4        | 2.913(11) |
| N(1)–N(2)           | 1.198(31) | N(3)–N(4)           | 1.191(30) |
| N(2)–N(3)           | 1.261(39) |                     |           |
| N(1)–N(2)–N(3)      | 165.2(3)  | N(3)–N(4)–N(3)#8    | 180.0(2)  |
| N(2)–N(3)–N(4)      | 165.9(3)  |                     |           |
| O(1)–Pb(1)–O(2)     | 76.8(3)   | O(1)–Pb(1)–O(4)     | 66.8(3)   |
| O(1)–Pb(1)–O(1)#1   | 75.1(3)   | O(1)–Pb(1)–O(2)#2   | 114.4(3)  |
| O(2)–Pb(1)–O(4)     | 75.9(3)   | O(2)–Pb(1)–N(1)     | 146.7(3)  |
| O(2)–Pb(1)–O(2)#2   | 63.5(4)   | O(2)–Pb(1)–O(4)#2   | 136.8(3)  |
| O(4)–Pb(1)–O(1)#1   | 137.0(3)  | O(4)–Pb(1)–O(2)#2   | 136.8(3)  |
| N(1)–Pb(1)–O(1)#1   | 75.5(4)   | N(1)–Pb(1)–O(2)#2   | 146.7(3)  |
| O(1)#1–Pb(1)–O(2)#2 | 76.8(3)   | O(1)#1–Pb(1)–O(4)#2 | 66.8(3)   |
| O(3)–Pb(2)–O(5)#3   | 68.7(4)   | O(3)–Pb(2)–O(6)#3   | 112.8(4)  |
| O(3)–Pb(2)–O(6)#6   | 90.0(3)   | O(3)–Pb(2)–O(3)#4   | 66.3(4)   |
| O(3)–Pb(2)–O(6)#7   | 91.2(4)   | O(5)#3–Pb(2)–O(6)#3 | 44.2(4)   |
| O(5)#3–Pb(2)–O(6)#6 | 152.9(4)  | O(5)#3–Pb(2)–O(3)#4 | 74.9(4)   |
| O(5)#3–Pb(2)–O(6)#7 | 95.2(4)   | O(6)#3–Pb(2)–O(5)#6 | 152.9(4)  |
| O(6)#3–Pb(2)–O(3)#4 | 90.0(3)   | O(6)#3–Pb(2)–O(6)#5 | 67.6(4)   |
| O(5)#6–Pb(2)–O(6)#6 | 44.2(4)   | O(5)#6–Pb(2)–O(3)#4 | 68.7(4)   |
| O(5)#6–Pb(2)–O(6)#7 | 109.2(4)  | O(6)#6–Pb(2)–O(3)#4 | 112.8(4)  |
| O(6)#6–Pb(2)–O(6)#7 | 67.6(4)   | O(3)#4–Pb(2)–O(6)#5 | 91.2(4)   |

|                     |          |                     |          |
|---------------------|----------|---------------------|----------|
| O(6)#5–Pb(2)–O(6)#7 | 111.4(4) | O(1)–Pb(3)–O(2)     | 74.6(2)  |
| O(1)–Pb(3)–O(5)#6   | 133.4(3) | O(1)–Pb(3)–O(3)#4   | 73.4(3)  |
| O(1)–Pb(3)–N(1)#4   | 70.0(5)  | O(2)–Pb(3)–O(3)#4   | 134.2(3) |
| O(2)–Pb(3)–O(5)#6   | 130.8(3) | O(3)–Pb(3)–O(4)#4   | 110.2(4) |
| O(2)–Pb(3)–N(1)#4   | 75.2(5)  | O(5)#6–Pb(3)–O(3)#4 | 61.5(3)  |
| O(3)–Pb(3)–O(3)#4   | 62.5(3)  | O(5)#3–Pb(2)–O(6)#5 | 109.2(4) |
| O(5)#6–Pb(3)–N(1)#4 | 144.6(5) | O(6)#3–Pb(2)–O(6)#6 | 153.2(3) |
| O(3)#4–Pb(3)–N(1)#4 | 121.6(5) | O(6)#3–Pb(2)–O(6)#7 | 96.9(4)  |
| O(1)–Pb(1)–N(1)     | 75.5(4)  | O(5)#6–Pb(2)–O(6)#5 | 95.2(4)  |
| O(1)–Pb(1)–O(4)#2   | 137.0(3) | O(6)#6–Pb(2)–O(6)#5 | 96.9(4)  |
| O(2)–Pb(1)–O(1)#1   | 114.4(3) | O(3)#4–Pb(2)–O(6)#7 | 157.4(4) |
| O(4)–Pb(1)–N(1)     | 76.4(3)  | O(1)–Pb(3)–O(3)     | 79.2(3)  |
| O(4)–Pb(1)–O(4)#2   | 135.1(3) | O(1)–Pb(3)–O(4)#4   | 78.9(3)  |
| N(1)–Pb(1)–O(4)#2   | 76.4(3)  | O(2)–Pb(3)–O(3)     | 80.0(3)  |
| O(2)#2–Pb(1)–O(4)#2 | 75.9(3)  | O(2)–Pb(3)–O(4)#4   | 149.2(4) |
| O(3)–Pb(2)–O(5)#6   | 74.9(4)  | O(3)–Pb(3)–O(5)#6   | 70.7(4)  |
| O(3)–Pb(2)–O(6)#5   | 157.4(4) | O(3)–Pb(3)–N(1)#4   | 144.4(5) |
| O(5)#3–Pb(2)–O(5)#6 | 136.2(4) | O(5)#6–Pb(3)–O(4)#4 | 79.4(4)  |
| O(4)#4–Pb(3)–N(1)#4 | 81.3(6)  | O(3)#4–Pb(3)–O(4)#4 | 47.8(4)  |

Symmetry codes: #1  $-x + 1, -y + 1, -z + 1$ ; #2  $x, -y + 1, z$ ; #3  $x + 1, y, z$ ; #4  $-x + 1, y, -z + 1$ ; #5  $-x + 1/2, -y + 3/2, -z + 1$ ; #6  $-x, y, -z + 1$ ; #7  $x + 1/2, -y + 3/2, z$ ; #8  $-x + 2, y, -z + 2$ .

**Table S2:**Selected bond lengths (Å) and angles (°) for  $\alpha$ -Pb(N<sub>3</sub>)<sub>2</sub>.

|                      |            |                     |            |
|----------------------|------------|---------------------|------------|
| Pb(1)–N(4)           | 2.711(8)   | Pb(1)–N(7)          | 2.632(7)   |
| Pb(1)–N(6)#1         | 2.796(8)   | Pb(1)–N(6)#2        | 2.695(8)   |
| Pb(1)–N(10)          | 2.604(8)   | Pb(1)–N(1)#1        | 2.896(4)   |
| Pb(1)–N(7)#3         | 2.613(8)   | Pb(1)–N(10)#3       | 2.753(8)   |
| Pb(2)–N(3)           | 2.651(11)  | Pb(2)–N(4)          | 2.578(8)   |
| Pb(2)–N(9)#4         | 2.890(8)   | Pb(2)–N(9)#2        | 2.890(8)   |
| Pb(2)–N(1)#1         | 2.629(10)  | Pb(2)–N(9)#5        | 2.833(8)   |
| Pb(2)–N(9)#6         | 2.833(8)   | Pb(2)–N(4)#7        | 2.578(8)   |
| N(4)–Pb(1)–N(7)      | 78.3(2)    | N(4)–Pb(1)–N(10)    | 78.5(2)    |
| N(4)–Pb(1)–N(6)#1    | 120.2(2)   | N(4)–Pb(1)–N(6)#2   | 84.3(2)    |
| N(4)–Pb(1)–N(10)#3   | 134.5(2)   | N(7)–Pb(1)–N(10)    | 68.7(3)    |
| N(7)–Pb(1)–N(6)#1    | 135.1(2)   | N(7)–Pb(1)–N(6)#2   | 74.7(2)    |
| N(7)–Pb(1)–N(10)#3   | 126.9(2)   | N(10)–Pb(1)–N(1)#1  | 79.5(3)    |
| N(10)–Pb(1)–N(6)#2   | 141.9(2)   | N(10)–Pb(1)–N(7)#3  | 99.3(2)    |
| N(1)#1–Pb(1)–N(6)#1  | 85.7(2)    | N(1)#1–Pb(1)–N(6)#2 | 124.4(3)   |
| N(1)#1–Pb(1)–N(10)#3 | 69.8(3)    | N(6)#1–Pb(1)–N(6)#2 | 67.9(2)    |
| N(6)#1–Pb(1)–N(10)#3 | 71.5(2)    | N(6)#2–Pb(1)–N(7)#3 | 83.2(2)    |
| N(7)#3–Pb(1)–N(10)#3 | 66.7(2)    | N(3)–Pb(2)–N(4)     | 73.6(2)    |
| N(3)–Pb(2)–N(9)#5    | 136.65(18) | N(3)–Pb(2)–N(9)#4   | 68.8(2)    |
| N(3)–Pb(2)–N(9)#6    | 136.65(18) | N(3)–Pb(2)–N(4)#7   | 73.6(2)    |
| N(4)–Pb(2)–N(9)#5    | 78.9(2)    | N(4)–Pb(2)–N(9)#4   | 141.5(2)   |
| N(4)–Pb(2)–N(9)#6    | 144.6(2)   | N(4)–Pb(2)–N(4)#7   | 99.1(3)    |
| N(1)#1–Pb(2)–N(9)#4  | 138.44(17) | N(1)#1–Pb(2)–N(9)#2 | 138.44(17) |
| N(1)#1–Pb(2)–N(4)#7  | 73.9(2)    | N(9)#5–Pb(2)–N(9)#4 | 124.8(2)   |
| N(9)#5–Pb(2)–N(9)#6  | 82.9(2)    | N(9)#5–Pb(2)–N(4)#7 | 144.6(2)   |
| N(9)#4–Pb(2)–N(9)#6  | 73.2(2)    | N(9)#4–Pb(2)–N(4)#7 | 78.2(2)    |
| N(9)#2–Pb(2)–N(4)#7  | 141.5(2)   | N(9)#6–Pb(2)–N(4)#7 | 78.9(2)    |
| N(4)–Pb(1)–N(1)#1    | 67.7(3)    | N(10)–Pb(1)–N(6)#1  | 149.4(2)   |
| N(4)–Pb(1)–N(7)#3    | 156.1(2)   | N(10)–Pb(1)–N(10)#3 | 78.3(3)    |
| N(7)–Pb(1)–N(1)#1    | 137.3(2)   | N(1)#1–Pb(1)–N(7)#3 | 135.8(2)   |
| N(7)–Pb(1)–N(7)#3    | 78.7(2)    | N(6)#1–Pb(1)–N(7)#3 | 73.2(2)    |

|                      |          |                      |          |
|----------------------|----------|----------------------|----------|
| N(6)#2–Pb(1)–N(10)#3 | 134.8(2) | N(1)#1–Pb(2)– N(9)#5 | 71.7(2)  |
| N(3)–Pb(2)–N(1)#1    | 128.9(3) | N(1)#1–Pb(2)–N(9)#6  | 71.7(2)  |
| N(3)–Pb(2)–N(9)#2    | 68.8(2)  | N(9)#5–Pb(2)–N(9)#2  | 73.2(2)  |
| N(4)–Pb(2)–N(1)#1    | 73.9(2)  | N(9)#4–Pb(2)–N(9)#2  | 80.9(2)  |
| N(4)–Pb(2)–N(9)#2    | 78.2(2)  | N(9)#2–Pb(2)–N(9)#6  | 124.8(2) |

Symmetry codes: #1  $x - 1, y, z$ ; #2  $-x + 1, -y + 1, -z + 1$ ; #3  $x - 1/2, y, -z + 3/2$ ; #4  $-x + 1, -y + 1/2, -z + 1$ ; #5  $-x + 1/2, -y + 1, z - 1/2$ ; #6  $-x + 1/2, y + 1/2, z - 1/2$ ; #7  $x, -y + 3/2, z$ .



**Table S3:**Selected bond lengths (Å) and angles (°) for **Pb-FBA**.

|                     |            |                     |            |
|---------------------|------------|---------------------|------------|
| Pb(1)–O(1)          | 2.293(3)   | Pb(2)–O(3)#2        | 2.806(4)   |
| Pb(1)–O(2)#1        | 2.554(5)   | Pb(2)–O(1)          | 2.257(3)   |
| Pb(1)–O(5)          | 2.435(5)   | Pb(2)–O(1)#1        | 2.302(3)   |
| Pb(1)–O(2)#3        | 2.800(4)   | Pb(2)–O(3)          | 2.558(4)   |
| Pb(1)–O(1)#1        | 2.307(3)   | Pb(2)–O(4)          | 2.490(5)   |
| O(1)–Pb(1)–O(5)     | 80.29(16)  | O(1)–Pb(2)–O(3)#2   | 75.82(12)  |
| O(1)–Pb(1)–O(2)#1   | 80.34(13)  | O(3)–Pb(2)–O(3)#2   | 124.42(14) |
| O(5)–Pb(1)–O(2)#1   | 160.62(17) | O(4)–Pb(2)–O(1)#1   | 77.21(14)  |
| O(1)#1–Pb(1)–O(2)#1 | 82.64(13)  | O(1)–Pb(2)–O(3)     | 90.43(14)  |
| O(1)–Pb(1)–O(2)#3   | 142.79(13) | O(1)–Pb(2)–O(1)#1   | 74.92(12)  |
| O(5)–Pb(1)–O(2)#3   | 80.69(18)  | O(3)–Pb(2)–O(1)#1   | 80.34(13)  |
| O(2)#3–Pb(1)–O(1)#1 | 74.98(12)  | O(3)#2–Pb(2)–O(1)#1 | 141.43(12) |
| O(1)–Pb(1)–O(1)#1   | 74.13(11)  | O(1)–Pb(2)–O(4)     | 89.32(14)  |
| O(5)–Pb(1)–O(1)#1   | 92.21(14)  | O(3)–Pb(2)–O(4)     | 156.80(16) |
| O(2)#3–Pb(1)–O(2)#1 | 115.55(13) | O(4)–Pb(2)–O(3)#2   | 77.88(16)  |

Symmetry codes: #1  $-x + 5/4, y - 3/4, z + 1/4$ ; #2  $x + 3/4, -y + 5/4, z - 1/4$ ; #3  $-x + 1/2, -y + 2, z + 1/2$ .

**Table S4:**

The calculated interaction energies corrected with BSSE and ZPE,  $\Delta E_{\text{int}}$  for the associations **Pb**⋯**N<sub>3</sub>** and **Pb**⋯**4-FBN** (kcal·mol<sup>-1</sup>). Values listed in parentheses correspond to the values obtained based on the SMD solvation model.

| Associations                     | $\Delta E_{\text{int}}$ |
|----------------------------------|-------------------------|
| <b>Pb</b> ⋯ <b>N<sub>3</sub></b> | -316.48 (-305.37)       |
| <b>Pb</b> ⋯ <b>4-FBN</b>         | -106.18 (-94.64)        |

**Table S5:**

Topological parameters at bond critical points of the Pb-N and N-N bonds in **MOF-N<sub>7</sub>'**

| BCPs       | $\rho(r)$ | $\nabla^2\rho(r)$ | $G(r)$   | $V(r)$    | $H(r)$    | $ V(r) /G(r)$ |
|------------|-----------|-------------------|----------|-----------|-----------|---------------|
| Pb(1)⋯N(1) | 0.028552  | 0.024241          | 0.012277 | -0.018494 | -0.006217 | 1.506394      |
| Pb(3)⋯N(1) | 0.018723  | 0.026135          | 0.008237 | -0.009940 | -0.001703 | 1.206750      |
| N(1)⋯N(2)  | 0.434017  | -0.829389         | 0.371937 | -0.951221 | -0.579284 | 2.557479      |
| N(2)⋯N(3)  | 0.370128  | -0.454354         | 0.266194 | -0.645976 | -0.379782 | 2.426711      |
| N(3)⋯N(4)  | 0.556798  | -1.459952         | 0.484983 | -1.334954 | -0.849971 | 2.752579      |

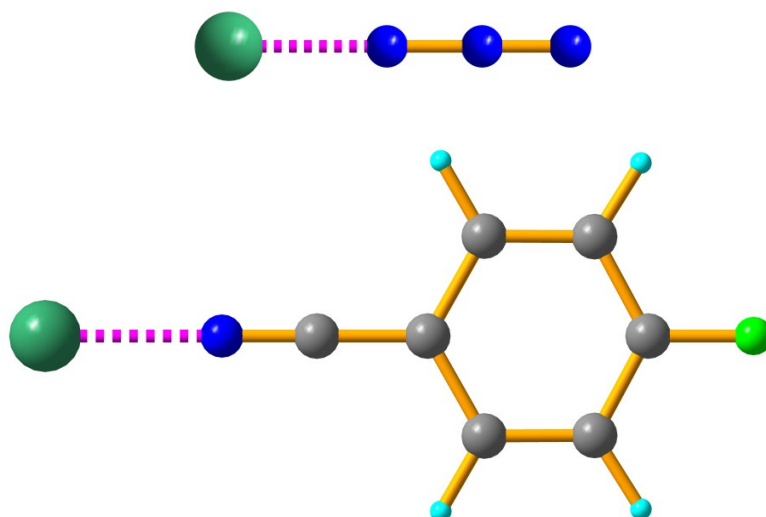

**Figure S1.** The calculated ground structures for the **Pb...N<sub>3</sub>** and **Pb...4-FBN** associations.

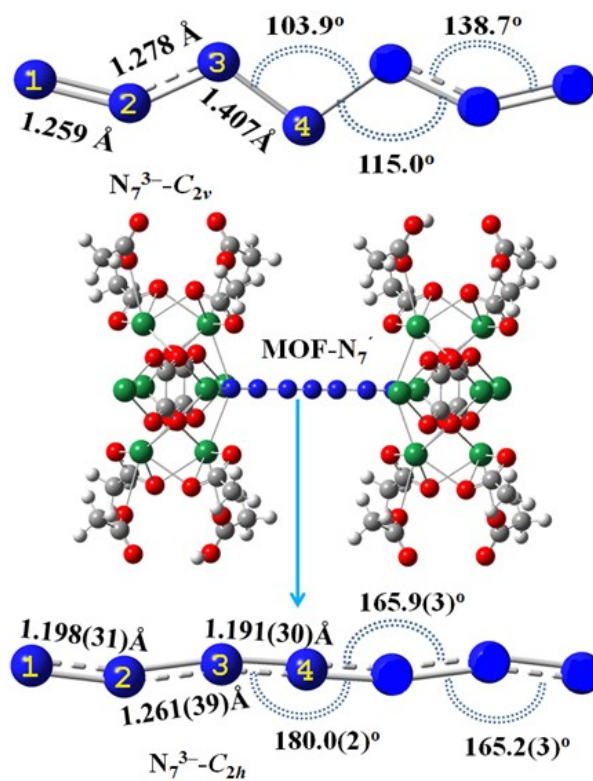

**Figure S2.** The structures of the representative fragments N<sub>7</sub><sup>3-</sup>-C<sub>2h</sub>, N<sub>7</sub><sup>3-</sup>-C<sub>2v</sub> and MOF-N<sub>7</sub>.

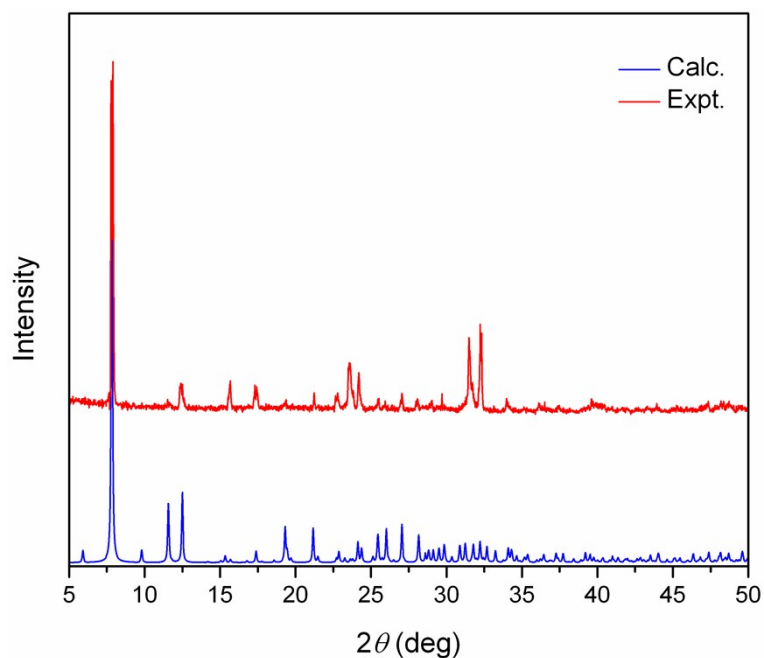

**Figure S3.** The XPRD patterns obtained for MOF-N<sub>7</sub>.

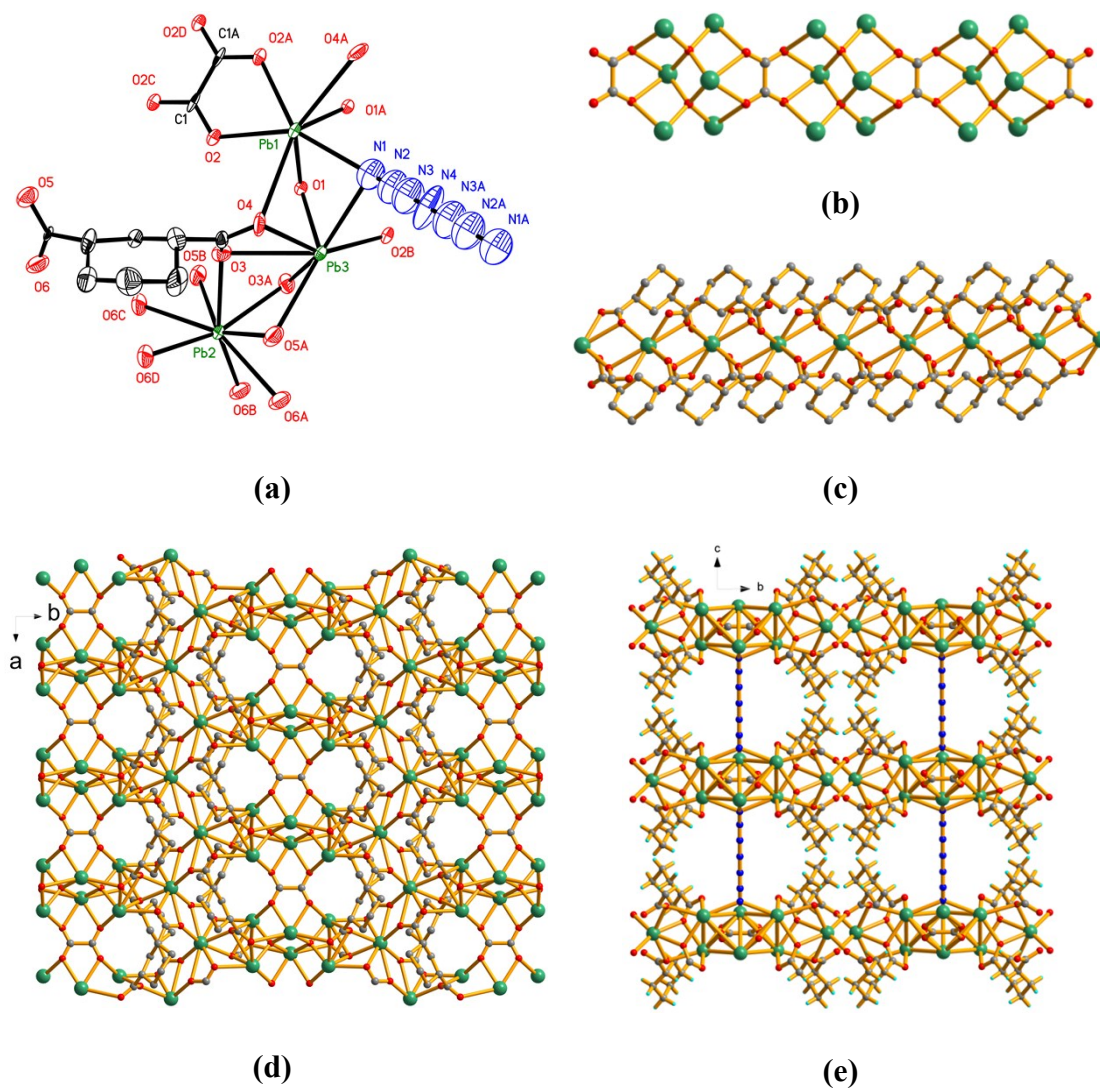

**Figure S4.** (a) The coordination environment of the Pb<sup>2+</sup> ions in **MOF-N<sub>7</sub>** with the ellipsoids drawn at the 30% probability level. Distorted water molecules and all hydrogen atoms were omitted for clarity. (b) The 1D chain constructed via the C<sub>2</sub>O<sub>4</sub><sup>2-</sup> anions and [Pb<sub>6</sub>O<sub>2</sub>]<sup>8+</sup> cationic clusters along the *a*-axis. (c) The 1D chain constructed via the CHDA<sup>2-</sup> anions and Pb<sup>2+</sup> ions along the *a*-axis. (d) The 2D metal-organic layer parallel to the *ab* plane in **MOF-N<sub>7</sub>**. (e) The 3D open framework constructed from the 2D layers and N<sub>7</sub> anionic pillars of **MOF-N<sub>7</sub>**.

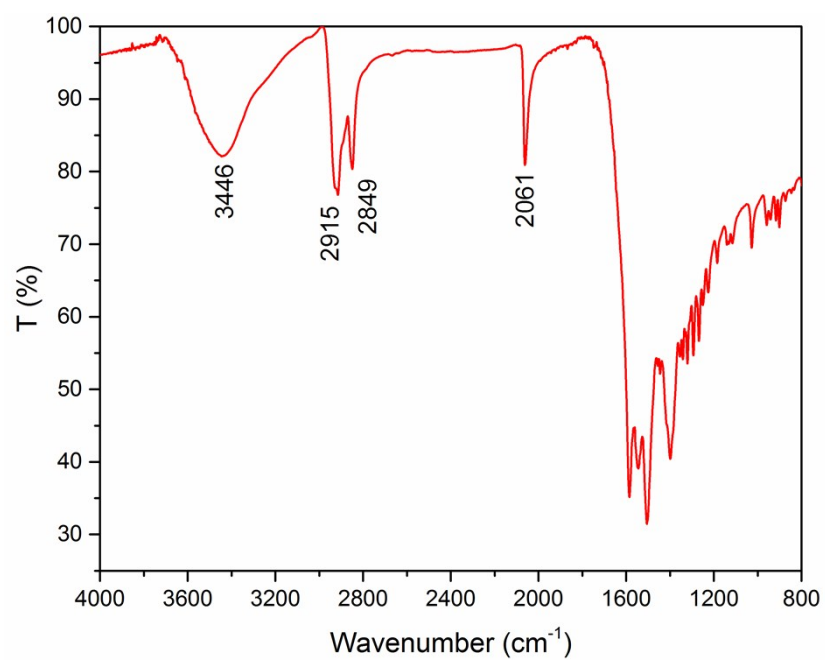

**Figure S5.** The FT-IR spectrum obtained of **MOF-N<sub>7</sub>**.

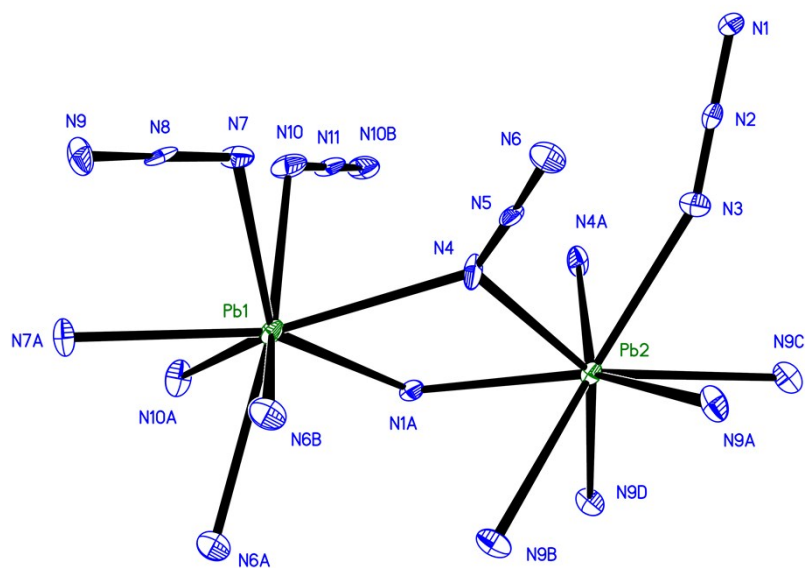

**Figure S6.** The coordination environment of the  $\text{Pb}^{2+}$  ions in  $\alpha\text{-Pb}(\text{N}_3)_2$  with the ellipsoids drawn at the 30% probability level.

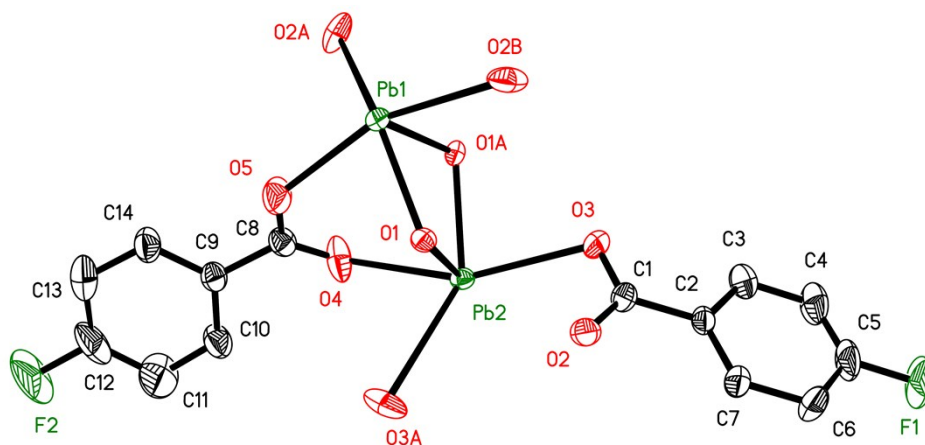

**Figure S7.** The coordination environment of the  $\text{Pb}^{2+}$  ion in **Pb-FBA** with the ellipsoids drawn at the 30% probability level. Distorted water molecules and all hydrogen atoms were omitted for clarity.



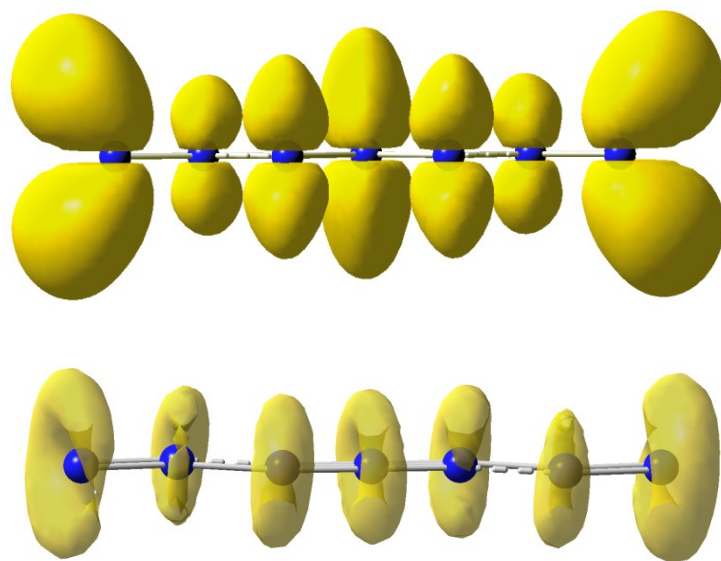

**Figure S8.** The ELF- $\pi$  isosurfaces (value = 0.70) of  $\text{N}_7^{3-}\text{-C}_{2v}$  (top) and the  $\text{N}_7^{3-}$  polynitrogen fragment in **MOF-N<sub>7</sub>'** (bottom).

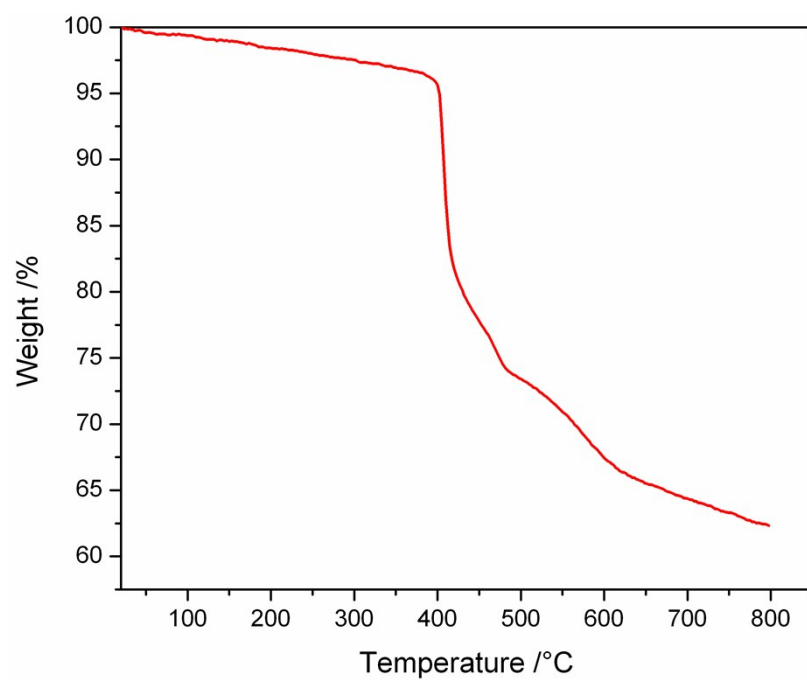

**Figure S9.** The TGA plot obtained for **Pb-FBA** at a heating rate of  $10^{\circ}\text{C}\cdot\text{min}^{-1}$  under a flow of  $\text{N}_2$ .
